# Supplementary material for: Large Paraumbilical Vein Shunts Increase the Risk of Overt Hepatic Encephalopathy after Transjugular Intrahepatic Portosystemic Shunt Placement
Source: MDPI journal article supplement (doi:10.3390/jcm12010158), 2022-12-25
Supplement: s1 [file s1]

**Table S1. Baseline Characteristics of Patients before PSM.**

| <b>Parameter</b>                       | <b>L-PUV<br/>(n=27)</b> | <b>Control group<br/>(n=191)</b> | <b>P<br/>Value</b> |
|----------------------------------------|-------------------------|----------------------------------|--------------------|
| Sex (male), n (%)                      | 15 (55.6%)              | 108 (56.5%)                      | 0.923              |
| Age (years)                            | 54.0 (42.0-66.0)        | 59.0 (49.0-68.0)                 | 0.102              |
| Viral hepatitis                        | 15 (55.6%)              | 97 (50.8%)                       | 0.642              |
| Ascites (present), n (%)               | 13 (48.1%)              | 104 (54.5%)                      | 0.539              |
| Previous diabetes, n (%)               | 4 (14.8%)               | 36 (18.8%)                       | 0.604              |
| Previous splenectomy, n (%)            | 0                       | 31 (16.2%)                       | 0.003              |
| Presence of gastric varices, n (%)     | 5 (18.5%)               | 10 (5.2%)                        | 0.027              |
| Portal vein thrombosis, n (%)          | 7 (25.9%)               | 55 (28.8%)                       | 0.755              |
| Total bilirubin (umol/L)               | 24.1 (16.0-39.5)        | 21.9 (15.2-28.9)                 | 0.176              |
| Albumin (g/L)                          | 28.6 (26.7-33.6)        | 30.7 (27.3-34.7)                 | 0.319              |
| Creatinine (umol/L)                    | 59.4 (45.9-67.2)        | 62.2 (53.0-72.9)                 | 0.071              |
| Prothrombin time (S)                   | 16.2 (14.7-18.7)        | 15.5 (14.1-17.0)                 | 0.074              |
| International normalised ratio         | 1.38 (1.23-1.60)        | 1.31 (1.20-1.46)                 | 0.126              |
| Platelet (×10 <sup>9</sup> /L)         | 59.0 (40.0-73.0)        | 69.0 (49.0-99.0)                 | 0.040              |
| White blood cell (×10 <sup>9</sup> /L) | 3.3(2.0-7.3)            | 5.0 (2.7-8.5)                    | 0.036              |
| Child-Pugh score (points)              | 7.0 (6.0-8.0)           | 7.0 (6.0-8.0)                    | 0.976              |
| Child-Pugh grade, n (%)                |                         |                                  | 0.399              |
| A                                      | 8 (29.6%)               | 69 (36.1%)                       |                    |
| B                                      | 15 (55.6%)              | 103 (53.9%)                      |                    |
| C                                      | 4 (14.8%)               | 19 (9.9%)                        |                    |
| MELD score (points)                    | 12.0 (10.0-13.0)        | 11.0 (9.0-13.0)                  | 0.102              |
| Diameter of LPV                        | 13.2 (10.7-14.8)        | 10.9 (9.2-12.5)                  | 0.001              |
| Diameter of RPV                        | 11.6 (8.1-13.0)         | 10.7 (8.7-12.0)                  | 0.439              |
| Diameter of MPV                        | 16.9 (13.8-20.6)        | 15.6 (13.9-17.8)                 | 0.258              |
| Esophageal variceal grade              |                         |                                  | 0.285              |
| 0                                      | 2 (7.4%)                | 2 (1.1%)                         |                    |
| I                                      | 1 (3.7%)                | 2 (1.1%)                         |                    |
| II                                     | 2 (7.4%)                | 19 (10.0%)                       |                    |
| III                                    | 22 (81.5%)              | 167 (87.9%)                      |                    |
| Portal vein puncture                   |                         |                                  | 0.316              |
| LPV                                    | 19 (70.4%)              | 123 (64.4%)                      |                    |
| RPV                                    | 7 (25.9%)               | 33 (17.3%)                       |                    |
| MPV                                    | 1 (3.7%)                | 35 (18.3%)                       |                    |

|                                                |                  |                  |       |
|------------------------------------------------|------------------|------------------|-------|
| Pre-TIPS PPG (mmHg)                            | 21.0 (18.0-21.0) | 21.0 (17.0-25.0) | 0.109 |
| Post-TIPS PPG (mmHg)                           | 7.0 (6.0-9.8)    | 8.0 (6.0-11.0)   | 0.261 |
| Diameter of expansion balloon catheters, n (%) |                  |                  | 0.731 |
| 6mm                                            | 6 (22.2%)        | 37 (19.4%)       |       |
| 8mm                                            | 21 (77.8%)       | 154 (80.6%)      |       |
| Duration of follow-up (months)                 | 22.0 (12.0-43.0) | 33.0 (20.0-47.0) | 0.061 |

---

Note: Data are expressed as median (IQR) or n (%). Abbreviations: PUV, paraumbilical veins; MELD, Model for End-Stage Liver Disease; LPV, left portal vein; RPV, right portal vein; MPV, main portal vein; EV, esophageal varices; TIPS, transjugular intrahepatic portosystemic shunt; PPG, portal pressure gradient.
