# Supplementary material for: Large Paraumbilical Vein Shunts Increase the Risk of Overt Hepatic Encephalopathy after Transjugular Intrahepatic Portosystemic Shunt Placement
Source: MDPI journal article supplement (doi:10.3390/jcm12010158), 2022-12-25
Supplement: s1 [file s1]

**Table S2. Characteristics of PUV.**

| <b>Parameter</b>                                     |                       |
|------------------------------------------------------|-----------------------|
| <b>L-PUV</b>                                         | <b>27/218 (12.4%)</b> |
| diameter of PUV (mm)                                 | 9.8 (8.8-14.0)        |
| cross-sectional PUV area (mm <sup>2</sup> )          | 75.4 (55.4-158.4)     |
| PUV diameter ≥ 8mm                                   | 23/27 (85.2%)         |
| PUV/MPV ratio >0.5, n (%)                            | 25/27 (92.6%)         |
| cross-sectional PUV area >83 mm <sup>2</sup> , n (%) | 13/27 (48.1%)         |

Abbreviations: PUV, paraumbilical veins; MPV, main portal vein; L-PUV, large paraumbilical veins.
